# Supplementary material for: DNA binding and RAD51 engagement by the BRCA2 C-terminus orchestrate DNA repair and replication fork preservation
Source: Springer Nature journal article supplement (doi:10.1038/s41467-023-36211-x), 2023-01-26
Supplement: MOESM1 [file 41467_2023_36211_MOESM1_ESM.pdf]

## **DNA Binding and RAD51 Engagement by the BRCA2 C-terminus Orchestrate DNA Repair and Replication Fork Preservation**

Youngho Kwon<sup>1,\*</sup>, Heike Rösner<sup>2,\*</sup>, Weixing Zhao<sup>1</sup>, Platon Selemenakis<sup>3,4</sup>, Zhuoling He<sup>1</sup>, Ajinkya S. Kawale<sup>1,5</sup>, Jeffrey N. Katz<sup>1</sup>, Cody M. Rogers<sup>1</sup>, Francisco E. Neal<sup>1</sup>, Aida Badamchi Shabestari<sup>1</sup>, Valdemaras Petrosius<sup>2</sup>, Akhilesh K. Singh<sup>6,7</sup>, Marina Z. Joel<sup>6,8</sup>, Lucy Lu<sup>6</sup>, Stephen P. Holloway<sup>1</sup>, Sandeep Burma<sup>1,9</sup>, Bipasha Mukherjee<sup>9</sup>, Robert Hromas<sup>10</sup>, Alexander Mazin<sup>1</sup>, Claudia Wiese<sup>3,\*\*</sup>, Claus S. Sørensen<sup>2,\*\*</sup>, and Patrick Sung<sup>1,\*\*</sup>

<sup>1</sup> Department of Biochemistry and Structural Biology and Greehey Children's Cancer Research Institute, University of Texas Health Science Center at San Antonio, Texas 78229, USA.

<sup>2</sup> Biotech Research and Innovation Centre, Faculty of Health and Medical Sciences, University of Copenhagen, DK-2200 Copenhagen N, Denmark.

<sup>3</sup> Department of Environmental and Radiological Health Sciences, Colorado State University, Fort Collins, Colorado, USA.

<sup>4</sup> Present address: Department of Cancer Biology, University of Texas MD Anderson Cancer Center, Houston, TX, USA.

<sup>5</sup> Present address: Massachusetts General Hospital Cancer Center, Harvard Medical School, Charlestown, MA 02129, USA.

<sup>6</sup> Department of Molecular Biophysics and Biochemistry, Yale University School of Medicine, New Haven, CT, USA.

<sup>7</sup> Present address: GentiBio Inc. 150 Cambridgepark Dr, Cambridge, MA, 02140, USA.

<sup>8</sup> Present address: Johns Hopkins University School of Medicine, Baltimore, MD, 21205, USA.

<sup>9</sup> Department of Neurosurgery, University of Texas Health Science Center at San Antonio, San Antonio, TX 78229, USA.

<sup>10</sup> Department of Medicine, University of Texas Health at San Antonio, 7703 Floyd Curl Drive, San Antonio, TX, 78229, USA.

\* These authors contributed equally.

\*\* Correspondence: [claudia.wiese@colostate.edu](mailto:claudia.wiese@colostate.edu), [claus.storgaard@bric.ku.dk](mailto:claus.storgaard@bric.ku.dk), [sungp@uthscsa.edu](mailto:sungp@uthscsa.edu)

-----  
Includes:

Supplementary Figures 1 through 5  
Supplementary Tables 1 and 2  
Supplementary References

Supplementary Fig. 1

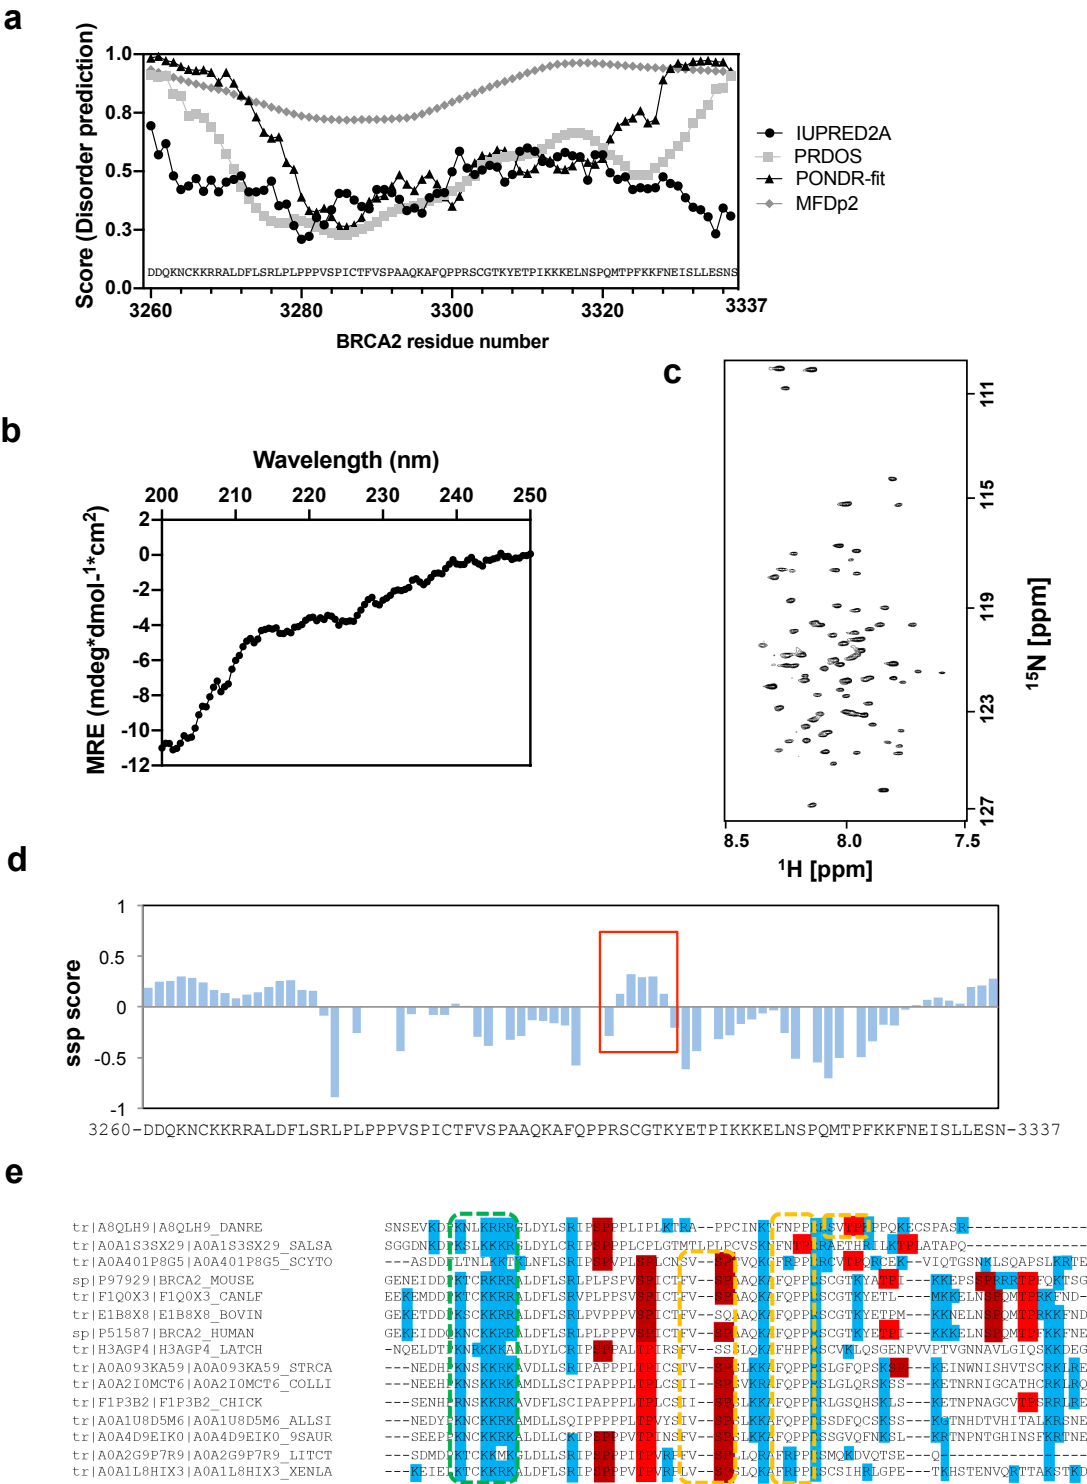

**Supplementary Fig. 1. Disordered conformation of BRCA2 CTRB and identified PTM motifs from GPS web server.**

- a,** Predicted disorder for the BRCA2-CTRB fragment (3260-3337). Four different disorder prediction algorithms (IUPRED2A, PONDR-fit, PRDOS, MFDp2) were used to calculate the degree of disorder. Source data are provided as a Source Data file.
- b,** Far UV-CD spectrum of the BRCA2-CTRB-derived polypeptide showing that it consists of random coil predominantly. Circular dichroism was recorded using 10  $\mu$ M BRCA2 CTRB (3260-3337) in 1 x PBS, pH 6.0, 10 mM DTT, at 25°C. Source data are provided as a Source Data file.
- c,**  $^1\text{H}$ - $^{15}\text{N}$ -HSQC spectrum of BRCA2-CTRB: The narrow peak dispersion in the proton dimension is clearly an indication for a predominantly disordered conformation in the BRCA2-CTRB. The  $^1\text{H}$ - $^{15}\text{N}$ -HSQC NMR spectrum was recorded using 20  $\mu$ M  $^1\text{H}$ - $^{15}\text{N}$ -labelled BRCA2 CTRB (3260-3337) in 1 x PBS, pH 6.0, 10 mM DTT, at 5°C.
- d,** Ssp-scores<sup>1</sup> for the BRCA2 CTRB polypeptide. Positive values indicate a preference for helical conformations, while negative values should be interpreted as an extended conformation. The majority of residues adopts a negative value unravelling the extended nature of the fragment. Two short regions of transient helicity can be found from residue 3260-3269 and residue 3300-3305 (as also highlighted by the red box). Source data are provided as a Source Data file.
- e,** Possible functional and post-translational modification (PTM) motifs in the CTRB. Representative excerpt of the alignment of vertebrate CTRB core fragment. Potential CDK phosphorylation sites are colored in red. All positively charged residues are colored in blue. The tandem FXXP motifs are highlighted within the yellow box. The cluster of highly conserved positive charges is highlighted within the green box.

Supplementary Fig. 2

a DNA binding by EMSA

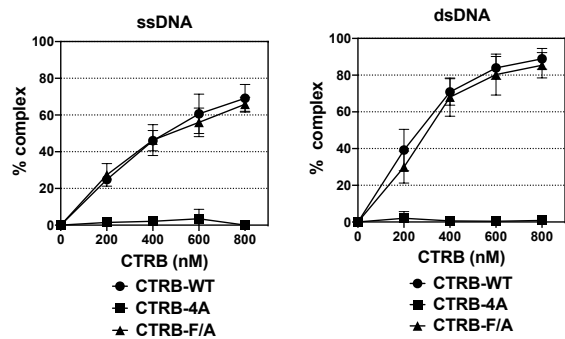

b DNA binding by EMSA

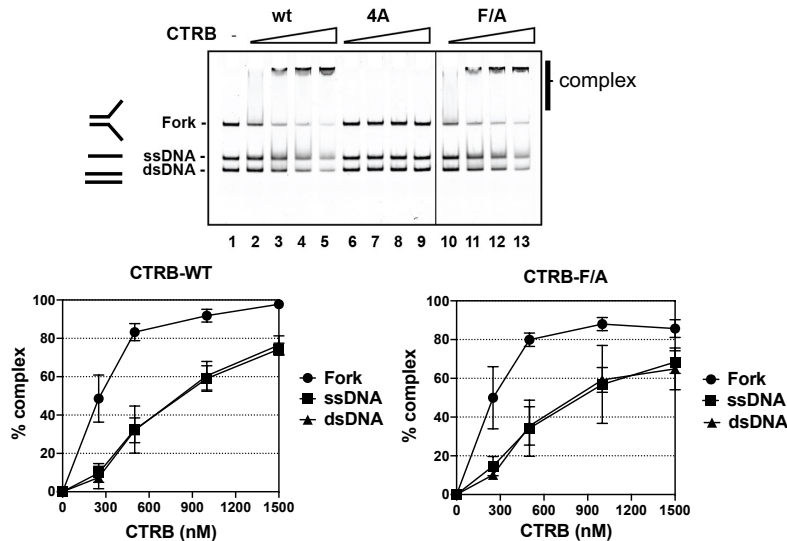

d

|                                   |         |         |              |         | RAD51 interaction    |   |
|-----------------------------------|---------|---------|--------------|---------|----------------------|---|
| 3265                              | 3270    | 3280    | 3290         | 3300    | (3265-3330)          | + |
| CKKRRALDFLSRLPLPPVSPICTFVSPAAQKAF | QPPRSCG | TKYETPI | IKKKELNSPQMT | PFKKFNE |                      |   |
| CKKRRALDFLSRLPLPPVSPICTFVSPAAQKAF | QPPRSCG | TKYETPI | IKKKELNSPQMT | PFKKFNE | Δ(3291~3295)         | + |
| CKKRRALDFLSRLPLPPVSPICTFVSPAAQKAF | QPPRSCG | TKYETPI | IKKKELNSPQMT | PFKKFNE | Δ(3296~3300)         | - |
| CKKRRALDFLSRLPLPPVSPICTFVSPAAQKAF | QPPRSCG | TKYETPI | IKKKELNSPQMT | PFKKFNE | Δ(3301~3305)         | - |
| CKKRRALDFLSRLPLPPVSPICTFVSPAAQKAF | QPPRSCG | TKYETPI | IKKKELNSPQMT | PFKKFNE | Δ(3306~3310)         | + |
| CKKRRALDFLSRLPLPPVSPICTFVSPAAQKAF | QPPRSCG | TKYETPI | IKKKELNSPQMT | PFKKFNE | S3291A               | + |
| CKKRRALDFLSRLPLPPVSPICTFVSPAAQKAF | QPPRSCG | TKYETPI | IKKKELNSPQMT | PFKKFNE | K3296A/F3298A/R3302A | - |
| CKKRRALDFLSRLPLPPVSPICTFVSPAAQKAF | QPPRSCG | TKYETPI | IKKKELNSPQMT | PFKKFNE | K3296A/R3302A        | + |
| CKKRRALDFLSRLPLPPVSPICTFVSPAAQKAF | QPPRSCG | TKYETPI | IKKKELNSPQMT | PFKKFNE | K3296A               | + |
| CKKRRALDFLSRLPLPPVSPICTFVSPAAQKAF | QPPRSCG | TKYETPI | IKKKELNSPQMT | PFKKFNE | R3302A               | + |
| CKKRRALDFLSRLPLPPVSPICTFVSPAAQKAF | QPPRSCG | TKYETPI | IKKKELNSPQMT | PFKKFNE | F3298A               | - |

**Supplementary Fig. 2. Biochemical activities of the CTRB.**

- a,** Quantification of DNA binding data from the experiment shown in Fig. 2c. (n=4 biologically independent experiments for WT; n=3 for F/A and 4A; mean value  $\pm$  SD). Source data are provided as a Source Data file.
- b,** The indicated CTRB species were incubated with ssDNA, dsDNA, and DNA fork and subject to EMSA. (n=6 biologically independent experiments for CTRB WT; n=3 for F/A and 4A; mean value  $\pm$  SD). The samples were derived from the same experiment and processed in parallel. Source data are provided as a Source Data file.
- c,** Pulldown assay to examine the effect of the CTRB-F/A, CTRB-S3291A, or CTRB-S3291E mutation on RAD51 interaction. The supernatant (S) containing unbound proteins and SDS eluate of the anti-S tag resin (E) were analyzed by SDS-PAGE and Coomassie blue staining. The samples were derived from the same experiment and processed in parallel. The experiment was repeated three times with similar results. Source data are provided as a Source Data file.
- d,** Mapping of the RAD51 interaction domain in the CTRB. GST-TR2 (BRCA2 residues 3265-3330)<sup>2</sup> and various point and truncation mutant derivatives were tested for RAD51 interaction using glutathione resin.

# Supplementary Fig. 3

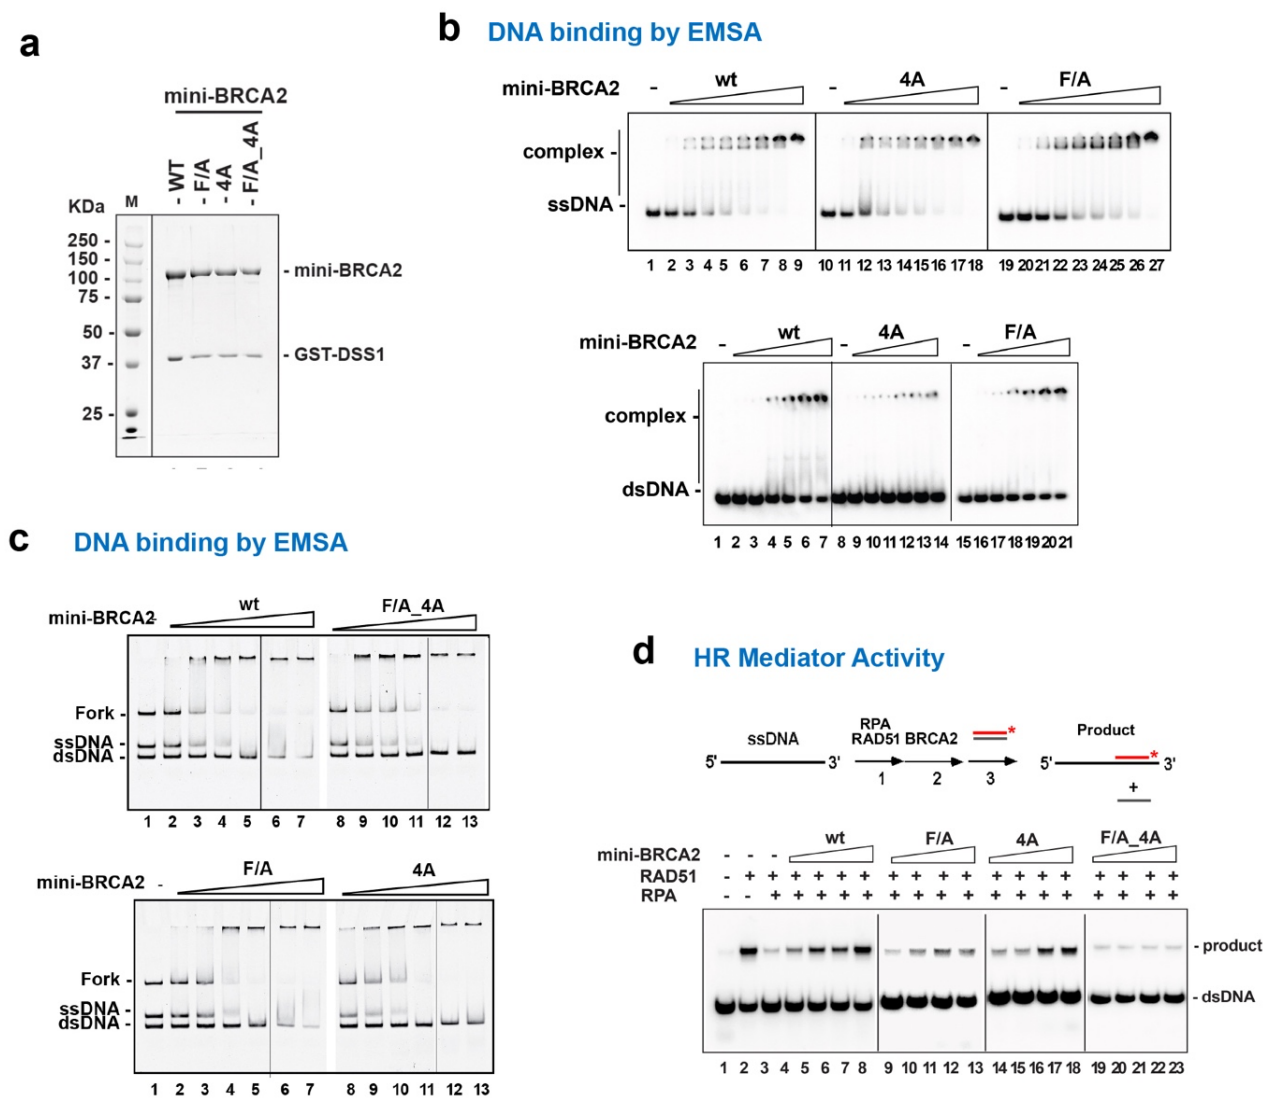

**Supplementary Fig. 3. Biochemical activities of mini-BRCA2/DSS1 harboring F/A, 4A, or F/A-4A mutation.**

- a**, SDS-PAGE of purified mini-BRCA2 protein species. The experiment was repeated three times with similar results. Source data are provided as a Source Data file.
- b**, EMSA performed with the mini-BRCA2/DSS1 proteins with <sup>32</sup>P-labeled ssDNA or dsDNA (13, 25, 38, 50, 63, 75, 100, 200 nM of mini-BRCA2/DSS1 for ssDNA; 25, 50, 100, 150, 200, 300 nM of mini-BRCA2/DSS1 for dsDNA). The samples were derived from the same experiment and processed in parallel. (n=3 biologically independent experiments). Source data are provided as a Source Data file.

- c,** EMSA performed with mini-BRCA2 proteins (30, 60, 90, 180, 270, 360 nM) with a mixture of Cy-5-labeled ssDNA, dsDNA, and DNA fork. The samples were derived from the same experiment and processed in parallel. The experiment was repeated twice with similar results. Source data are provided as a Source Data file.
- d,** Testing of mini-BRCA2/DSS1 (50, 100, 200, 300 nM) species for HR mediator activity with RAD51 (2  $\mu$ M) and RPA (500 nM), as indicated. The samples were derived from the same experiment and processed in parallel. (n=4 biologically independent experiments). Source data are provided as a Source Data file.

Supplementary Fig. 4

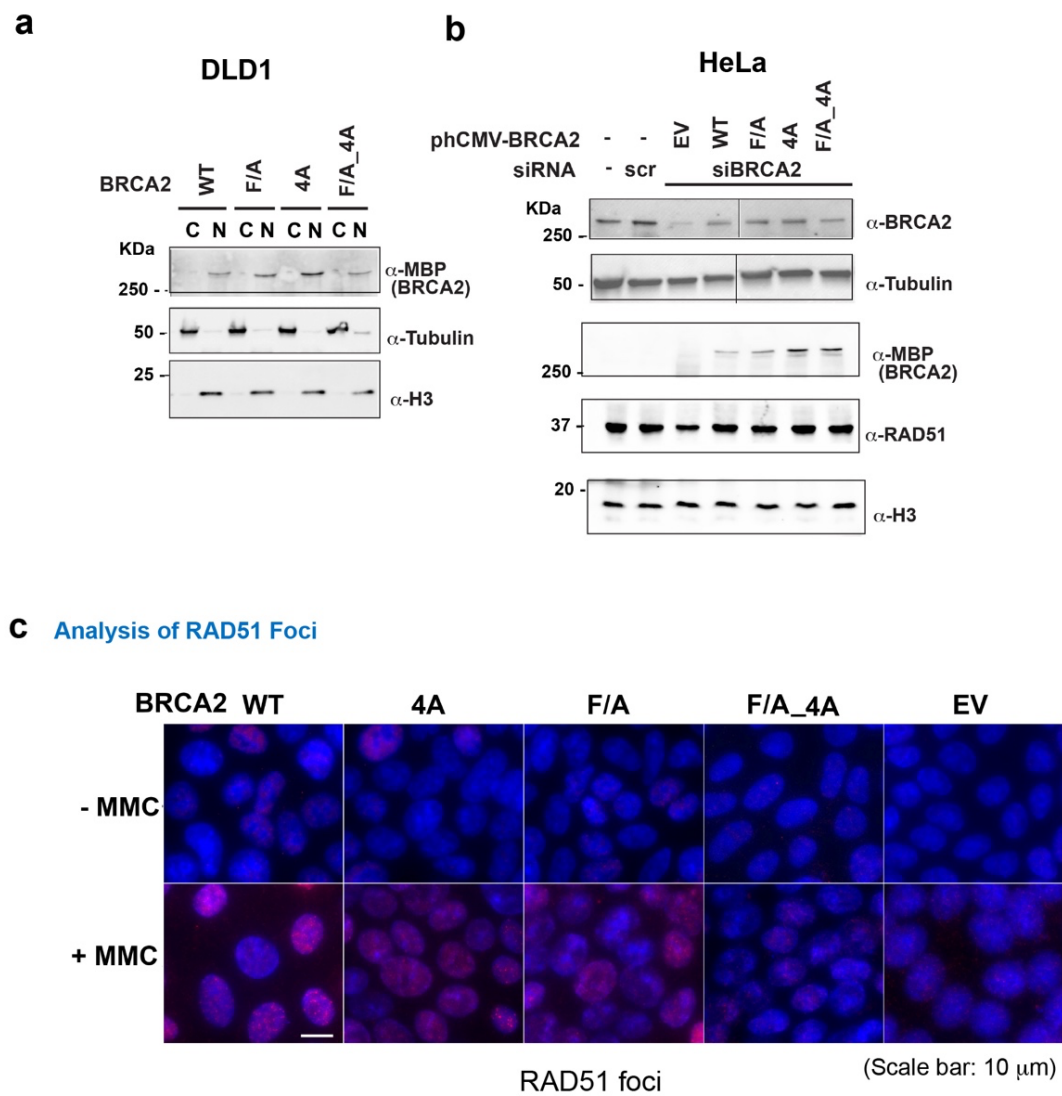

**Supplementary Fig. 4. Expression, cellular localization, and RAD51 foci analyses of BRCA2 and mutants.**

- a**, Western blot analysis of cytoplasmic (C) and nuclear (N) fractions prepared from DLD-1 cells expressing either wild type BRCA2 or its CTRB mutant variants. The samples were derived from the same experiment and processed in parallel. These samples were analyzed in two gels, with the top panel ( $\alpha$ -MBP (BRCA2)) from one gel and the bottom two panels ( $\alpha$ -Tubulin,  $\alpha$ -H3) from another gel. The experiment was repeated three times with similar results. Source data are provided as a Source Data file.
- b**, Western blot analysis to verify ectopic expression of BRCA2 and CTRB mutants in HeLa cells. MBP-tagged BRCA2 species were expressed after treatment of HeLa DR-GFP cells with BRCA2 siRNA (siBRCA2) or scrambled RNA (scr). The samples were derived from the same experiment



and processed in parallel. These samples were analyzed in two gels, with the upper two panels ( $\alpha$ -BRCA2 and  $\alpha$ -Tubulin (loading control)) from one gel and the bottom three panels ( $\alpha$ -MBP,  $\alpha$ -RAD51, and  $\alpha$ -H3 (loading control)) from another gel. The experiment was repeated twice with similar results. Source data are provided as a Source Data file.

- c,** Representative micrographs of RAD51 foci (red) in the nuclei (blue: DAPI staining) of DLD1-cells expressing BRCA2 or the indicated CTRB mutant after 1  $\mu$ M MMC treatment for 16 h. Bar: 10  $\mu$ m. EV: empty vector (phCMV-2MBP), NT: not-treated. The samples were derived from the same experiment and processed in parallel.

## Supplementary Fig. 5

### DNA Fiber Analysis

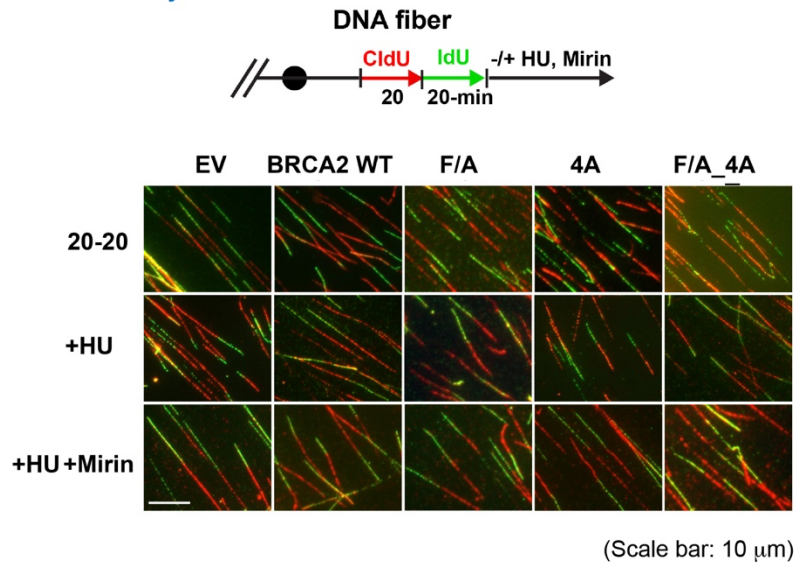

### Supplementary Fig. 5. Analysis of impact of BRCA2 CTRB mutations on replication fork stability

Representative micrographs of CldU/IdU replication tracts in DLD1 cells expressing the indicated BRCA2. Cells were pulse-labeled 20 min each by CldU and IdU and then exposed to HU with or without mirin. The samples were derived from the same experiment and processed in parallel.

**Supplementary Table 1: Sites of potential post-translational modification as predicted by the GPS web server<sup>3,4</sup>.**

| ID   | Position | Code | Enzyme                      | Peptide                           | Score   | Cutoff  |
|------|----------|------|-----------------------------|-----------------------------------|---------|---------|
| CTRB | 36       | K    | Cullin                      | ICTFVSPAAQ <b>K</b> AFQPPRSCGT    | 0.907   | 0.6726  |
| CTRB | 67       | K    | RING/SCF/F-box<br>Cullin    | LNSPQMTPF <b>K</b> KFNEISLLESN    | 0.7666  | 0.6726  |
| CTRB | 36       | K    | RING/SCF/F-box<br>APC_C     | ICTFVSPAAQ <b>K</b> AFQPPRSCGT    | 0.9992  | 0.0161  |
| CTRB | 47       | K    | APC_C                       | AFQPPRSCGT <b>K</b> YETPIKKKEL    | 0.9963  | 0.0161  |
| CTRB | 53       | K    | APC_C                       | SCGTKYETPI <b>K</b> KKELNSPQMT    | 0.9962  | 0.0161  |
| CTRB | 54       | K    | APC_C                       | CGTKYETPI <b>K</b> KKELNSPQMTP    | 0.9968  | 0.0161  |
| CTRB | 55       | K    | APC_C                       | GTKYETPI <b>K</b> KKELNSPQMTPF    | 0.9995  | 0.0161  |
| CTRB | 66       | K    | APC_C                       | ELNSPQMTPF <b>K</b> KFNEISLLES    | 0.9988  | 0.0161  |
| CTRB | 67       | K    | APC_C                       | LNSPQMTPF <b>K</b> KFNEISLLESN    | 0.989   | 0.0161  |
| CTRB | 67       | K    | Sumoylation<br>Nonconsensus | PQMTPF <b>K</b> KFNEISLL          | 3.62    | 3.32    |
| CTRB | 71 - 75  |      | SUMO                        | PFKKFNE <b>I</b> SLLESN*****      | 40.379  | 29.92   |
| CTRB | 64       | S    | Interaktion<br>AGC/PKA      | IKKKELNSP QMTPF                   | 23.553  | 22.884  |
| CTRB | 64       | S    | CAMK/CASK                   | IKKKELNSP QMTPF                   | 4.136   | 3.657   |
| CTRB | 79       | S    | CAMK/CASK                   | KKFNE I <b>S</b> LLESN**          | 4.347   | 3.657   |
| CTRB | 64       | S    | CAMK/DAPK                   | IKKKELNSP QMTPF                   | 11.805  | 9.755   |
| CTRB | 64       | S    | CAMK/PIM                    | IKKKELNSP QMTPF                   | 16.521  | 15.765  |
| CTRB | 83       | S    | CAMK/PKD                    | E I <b>S</b> LLESN*****           | 22.885  | 21.331  |
| CTRB | 69       | T    | CAMK/TSSK                   | LNSP QMT <b>P</b> FKKFNE          | 4.563   | 3.512   |
| CTRB | 64       | S    | CK1                         | IKKKELNSP QMTPF                   | 6.585   | 6.306   |
| CTRB | 69       | T    | CMGC                        | LNSP QMT <b>P</b> FKKFNE          | 43.002  | 40.815  |
| CTRB | 64       | S    | CMGC/CDK                    | IKKKELNSP QMTPF                   | 12.353  | 10.587  |
| CTRB | 34       | S    | CMGC/CDK                    | PICTFV <b>S</b> PAAQKAF           | 10.379  | 6.537   |
| CTRB | 69       | T    | CMGC/CDK                    | LNSP QMT <b>P</b> FKKFNE          | 14.171  | 10.587  |
| CTRB | 83       | S    | CMGC/CDKL                   | E I <b>S</b> LLESN*****           | 6.119   | 4.358   |
| CTRB | 79       | S    | CMGC/CK2                    | KKFNE I <b>S</b> LLESN**          | 3.412   | 2.665   |
| CTRB | 64       | S    | CMGC/DYRK                   | IKKKELNSP QMTPF                   | 18.798  | 17.356  |
| CTRB | 26       | S    | CMGC/GSK                    | PLP PPV <b>S</b> PICTFV           | 9.442   | 8.674   |
| CTRB | 64       | S    | CMGC/GSK                    | IKKKELNSP QMTPF                   | 9.247   | 8.674   |
| CTRB | 26       | S    | CMGC/MAPK                   | PLP PPV <b>S</b> PICTFV           | 14.868  | 12.837  |
| CTRB | 64       | S    | CMGC/MAPK                   | IKKKELNSP QMTPF                   | 12.865  | 12.837  |
| CTRB | 47       | S    | CMGC/SRPK                   | AFQP PR <b>S</b> CGTKYET          | 390.512 | 319.434 |
| CTRB | 64       | S    | TKL                         | IKKKELNSP QMTPF                   | 5.474   | 5.299   |
| CTRB | 26       | S    | TKL/RAF                     | PLP PPV <b>S</b> PICTFV           | 2.504   | 2.477   |
| CTRB | 16       | S    | Othar/CAMKK                 | RA LD <b>F</b> L <b>S</b> RLPLP P | 4.31    | 3.05    |
| CTRB | 16       | S    | Othar/Haspen                | RA LD <b>F</b> L <b>S</b> RLPLP P | 2.495   | 0.998   |
| CTRB | 79       | S    | Othar/IKK                   | KKFNE I <b>S</b> LLESN**          | 11.146  | 8.821   |
| CTRB | 64       | S    | Othar/MOS                   | IKKKELNSP QMTPF                   | 3.158   | 2.885   |
| CTRB | 79       | S    | Othar/MOS                   | KKFNE I <b>S</b> LLESN**          | 3.299   | 2.885   |
| CTRB | 83       | S    | Othar/MOS                   | E I <b>S</b> LLESN*****           | 3.219   | 2.885   |
| CTRB | 64       | S    | Othar/PEK                   | IKKKELNSP QMTPF                   | 2.369   | 1.697   |
| CTRB | 69       | T    | Othar/PEK                   | LNSP QMT <b>P</b> FKKFNE          | 3.724   | 1.697   |
| CTRB | 79       | S    | Othar/PEK                   | KKFNE I <b>S</b> LLESN**          | 5.343   | 1.697   |
| CTRB | 83       | S    | Othar/PEK                   | E I <b>S</b> LLESN*****           | 5.03    | 1.697   |
| CTRB | 79       | S    | Othar/PLK                   | KKFNE I <b>S</b> LLESN**          | 15.091  | 14.476  |
| CTRB | 16       | S    | Othar/TLK                   | RA LD <b>F</b> L <b>S</b> RLPLP P | 2.318   | 2.277   |

|      |    |   |              |                                   |       |       |
|------|----|---|--------------|-----------------------------------|-------|-------|
| CTRB | 69 | T | Othar/TLK    | LNSP QMT <b>P</b> FKKFNE          | 2.375 | 2.277 |
| CTRB | 79 | S | Othar/TOPK   | KKFNE IS <b>L</b> LESN**          | 3.683 | 3.19  |
| CTRB | 79 | S | Dual/TK/Lumr | KKFNE IS <b>L</b> LESN**          | 6.285 | 5.599 |
| CTRB | 16 | S | Dual/TK/Src  | RA LDFL <b>S</b> RPLP P           | 4.121 | 4.017 |
| CTRB | 64 | S | Dual/TK/Src  | IKKKELN <b>S</b> P QMT <b>P</b> F | 4.202 | 4.017 |

**Supplementary Table 2: Oligomers and DNA substrates used in this study**

|                 |                                                                                                                                                                  |
|-----------------|------------------------------------------------------------------------------------------------------------------------------------------------------------------|
| Oligo- H3       | 5' -TTGATAAGAGGTCATTTGAATTCATGGCTTAGAGCTTAATTGCTGAATCT<br>GGTGCTGGGATCCAACATGT TTAAATATG                                                                         |
| Oligo- H4       | 5'- CATATTTAAAAACATGTTGGATCCCAGCACCAGATTCAGCAATTAAGCTCT<br>AAGCCATGAATTCAAATGAC CTCTTATCAA                                                                       |
| Oligo- H5       | 5'- CATATTTAAAAACATGTTGGATCCCAGCACCAGATTCAGCATACGTTACCG<br>ATCGTACGTT CGATGCTGGC TACTGCTAGC                                                                      |
| Oligo-2040      | 5'-AAATGAACATAAAAGTAAATAAGTATAAGGATAATACAAAATAAGTAAATG<br>AATAAACATAGAAAATAAAGTAAAGGATATAAA                                                                      |
| Oligo-2041      | 5'TTTATATCCTTTACTTTATTTTCTATGTTTATTCATTTACTTATTTTGTATTAT<br>CCTTATACTTATTTACTTTATGTTCATT                                                                         |
| Oligo-A         | 5'-TCTTATTTATGTCTCTTTTATTTTCATTTCTATATTTATTCCTATTATGTTTTATT<br>CATTTACTTATTCTTTATGTTCATTTTTATATCCTTTACTTTATTTTCTCTGTTTAT<br>TCATTTACTTATTTTGTATTATCCTTATCTTATTTA |
| Oligo-B         | 5'- TAATACAAAATAAGTAAATGAATAAACAGAGAAAATAAAG                                                                                                                     |
| Oligo-C         | 5'- CTTTATTTTCTCTGTTTATTCATTTACTTATTTTGTATTA                                                                                                                     |
| Oligo-12mer     | 5'- GGCTATGCG TTA                                                                                                                                                |
| 80bp dsDNA      | Annealed product of 5'- <sup>32</sup> P- (or Cy5-) labeled Oligo-H3 and Oligo-H4                                                                                 |
| 83bp dsDNA Trap | Annealed product of Oligo-2040 and Oligo-2041                                                                                                                    |
| 40mer dsDNA     | Annealed product of 5'- <sup>32</sup> P- labeled Oligo-B and Oligo-C                                                                                             |
| Fork substrate  | Annealed product of 5'-Cy5- labeled Oligo-H3 and Oligo-H5                                                                                                        |

## Supplementary References

1. Marsh, J.A., Singh, V.K., Jia, Z. & Forman-Kay, J.D. Sensitivity of secondary structure propensities to sequence differences between alpha- and gamma-synuclein: implications for fibrillation. *Protein Sci* **15**, 2795-804 (2006).
2. Esashi, F. et al. CDK-dependent phosphorylation of BRCA2 as a regulatory mechanism for recombinational repair. *Nature* **434**, 598-604 (2005).
3. Wang, C. et al. GPS 5.0: An Update on the Prediction of Kinase-specific Phosphorylation Sites in Proteins. *Genomics Proteomics Bioinformatics* **18**, 72-80 (2020).
4. Zhao, Q. et al. GPS-SUMO: a tool for the prediction of sumoylation sites and SUMO-interaction motifs. *Nucleic Acids Res* **42**, W325-30 (2014).
